# Supplementary material
Source: PubMed Central journal article supplement (PMC2872431)
Supplement: 0911635107_pnas.200911635SI.pdf [file 0911635107_pnas.200911635SI.pdf]

# Supporting Information

Nelson et al. 10.1073/pnas.0911635107

## SI Methods

**Microarray Analysis.** Four biological replicates per treatment were tested for PD *Ler* seed, and three were tested for *gal-3* seed. Independent seed batches were used for each biological replicate. Array data were GC-RMA normalized, and the average KAR<sub>1</sub>/water (K/W) fold change (FC) of a probeset was calculated for each genotype. Remarkably, maximum FC was ~6- to 7-fold, and only a few genes had FC > 3. In experiments with low numbers of replicates and small changes in expression, the application of false discovery rate (FDR) to reduce type 1 errors (false positives) from *P* value inferences results in substantial type 2 error (false negatives) [Nettleton D (2006) *Plant Cell* 18:2112–2121]. Consequently, we adopted an atypical approach to identify the most highly KAR<sub>1</sub>-responsive genes.

Because our primary interest in this experiment was variation due to treatment rather than genotype, we combined the PD *Ler* and *gal-3* datasets and performed a paired Student's *t* test with the

seven arrays between treatments to identify significant changes in expression for each gene ( $P < 0.01$ ). This set was filtered by a FC > 1.5 cutoff to give the Criteria I list of highly KAR<sub>1</sub>-responsive genes for each genotype (Table S1). Because we also anticipated a treatment–genotype interaction component to variation (i.e., some transcripts, such as *GA3ox1*, may have very low expression or altered response to KAR<sub>1</sub> as a result of GA abundance in one genotype), we tested the remaining probesets for each genotype with a paired Student's *t* test. Criteria II probesets with significant responses ( $P < 0.05$  and FC > 1.5) to treatment were thus separately identified for PD *Ler* and *gal-3* (Table S2). It is notable that the majority of potential KAR<sub>1</sub>-responsive genes were already captured by Criteria I selection (Table 1). This approach produced similar results to a linear model analysis without an interaction component. However, seed dormancy is notoriously variable from batch to batch, and therefore we considered paired testing to be more appropriate than a linear model.

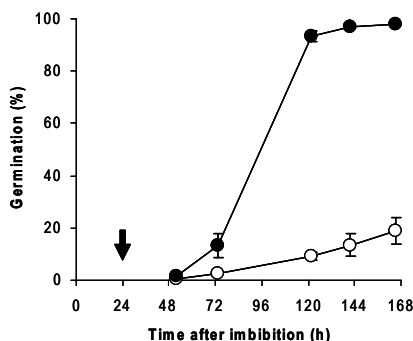

Fig. S1. Germination of PD *Ler* seed on water agar with (filled circles) or without (open circles) 1 μM KAR<sub>1</sub> under continuous white light at 20 °C. Arrow indicates pregermination time point chosen for microarray analysis. Mean ± SD,  $n = 3$ , 100 seeds per sample.

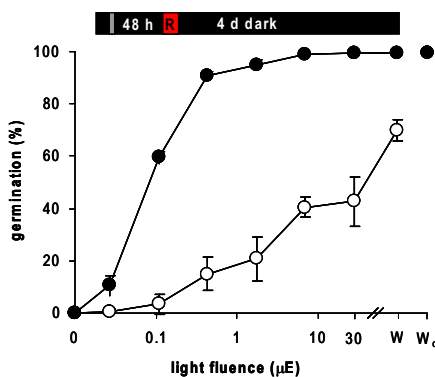

Fig. S2. Karrikins enhance light-dependent germination of *Arabidopsis* seed. Afterripened seed was imbibed on water-agar (open circles) or 1 μM KAR<sub>1</sub> (filled circles) in the dark for 1 h, exposed to 5 min of FR, incubated in the dark for 48 h, then given 1 h of R light of the indicated intensity. Germination was assessed after a further 4-d dark incubation. Seeds treated with a white light (100 μE) pulse (W) or continuous white light for 4 d (Wc) are shown for comparison. Mean ± SD,  $n = 3$ , ≥100 seeds per sample.

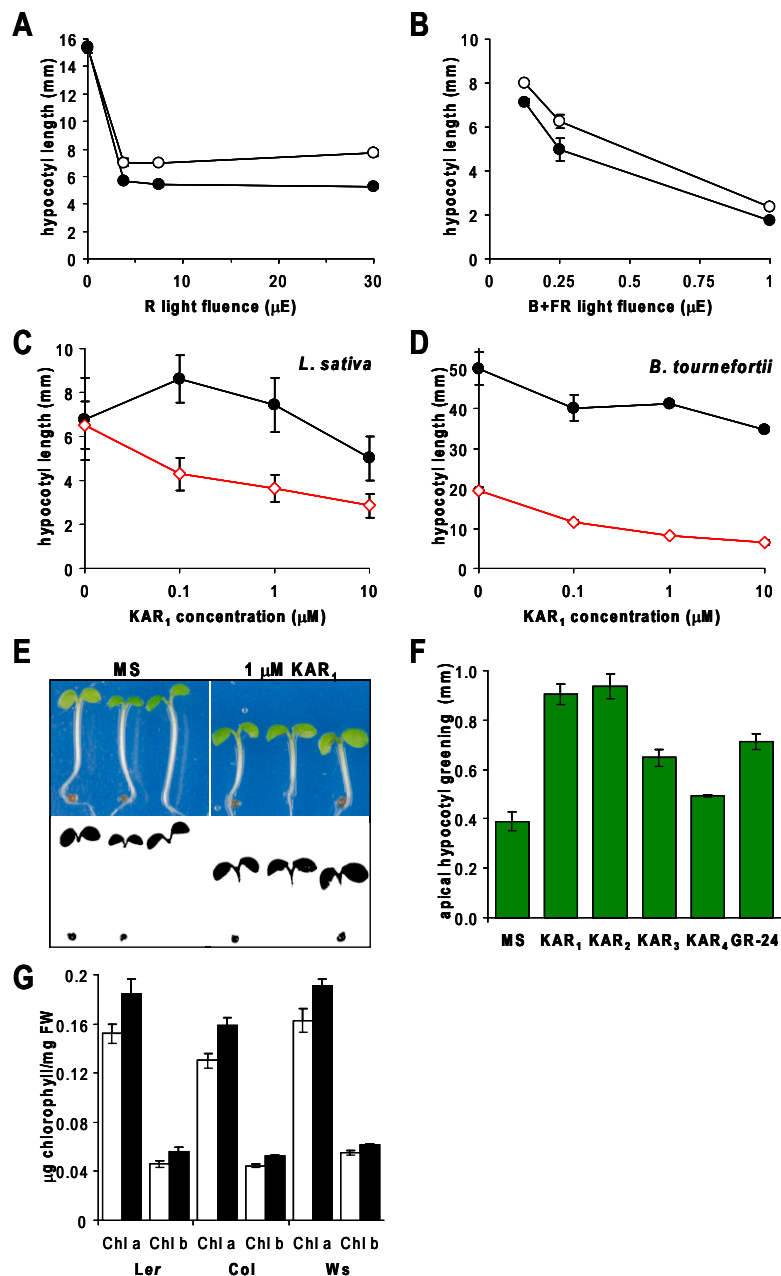

**Fig. S3.** Karrikins promote seedling responses to light. (A) *Ler* seedlings grown on 0.5 $\times$  MS or 1  $\mu\text{M}$  KAR<sub>1</sub> under the indicated R light fluence. (B) *Ler* seedlings grown on 0.5 $\times$  MS or 1  $\mu\text{M}$  KAR<sub>1</sub> under the indicated blue + far red (B+FR) light fluence. For A and B, mean  $\pm$  SEM,  $n = 3$ ,  $\geq 25$  seedlings per sample, except dark  $\geq 13$  seedlings per sample. (C) Lettuce seed (*Lactuca sativa* L. cv. Grand Rapids) was plated on 0.8% agar supplemented with indicated concentrations of KAR<sub>1</sub> under room light then wrapped in foil or put under Rc for 3 d growth. Mean  $\pm$  SD, 20 seedlings per point except for dark, 13 seedlings. (D) A nondormant collection of *B. tournefortii* seed was plated on 0.8% agar under room light and then placed in darkness at 20  $^{\circ}\text{C}$ . After 45 h, germinated seeds ( $\sim 2$ –5 mm radicle length but no cotyledon emergence) were transferred to 0.8% agar supplemented with indicated concentrations of KAR<sub>1</sub> and grown under Rc for 4 d. Mean  $\pm$  SEM,  $n = 3$ , 9 seedlings per sample. (E) Green pigmentation of the apical hypocotyl of seedlings grown under Rc (as for hypocotyl elongation assays) was visualized through RGB splitting in ImageJ. (F) Maximum contiguous length of above threshold signal, as shown in (E), from shoot apex for seedlings grown on karrikins and GR-24 as in Fig. 4. Mean  $\pm$  SEM,  $n = 3$ ,  $\geq 11$  seedlings per sample. (G) Chlorophyll from 50 seedlings grown under Rc conditions on 0.5 $\times$  MS (open bars) or 1  $\mu\text{M}$  KAR<sub>1</sub> (filled bars) was extracted in buffered 80% acetone and assayed spectrophotometrically. Mean  $\pm$  SEM,  $n = 3$ .



**Table S1. Criteria I gene sets for PD Ler and *ga1-3* seed imbibed for 24 h**

Paired t test was performed against the seven (four PD Ler, three *ga1-3* per treatment) ATH1 microarrays of samples treated with water or 1 mM KAR1. Probesets with  $P < 0.01$  and FC of at least 1.5-fold magnitude are shown here for each genotype. Genes examined by qRT-PCR (Fig. 1) are highlighted in blue. The PD Ler up-regulated set are referred to as KAR-UP in the text.

[Table S1 \(XLS\)](#)

**Table S2. Criteria II gene sets for PD Ler and *ga1-3* seed imbibed for 24 h**

Paired t test was performed against the four ATH1 microarrays per treatment of PD Ler samples treated with water or 1 mM KAR1. Probesets with  $P < 0.05$  and FC of at least 1.5-fold magnitude are shown here. The same selection was performed against the three ATH1 microarrays per treatment of *ga1-3* samples to generate the *ga1-3* Criteria II list. Genes examined by qRT-PCR (Fig. 1) are highlighted in blue.

[Table S2 \(XLS\)](#)

**Table S3. Summary of comparisons of KAR-UP genes to previously published genomic studies**

[Table S3 \(XLS\)](#)

**Table S4. Comparison of KAR-UP genes to previously published genomic studies**

[Table S4 \(XLS\)](#)

**Table S5. qRT-PCR primers**

[Table S5 \(XLS\)](#)
